# Supplementary material
Source: Springer Nature journal article supplement (https://www.springermedizin.de/resource/supplementary/40478_2014_112_MOESM8_ESM.pdf/25658170)

**a**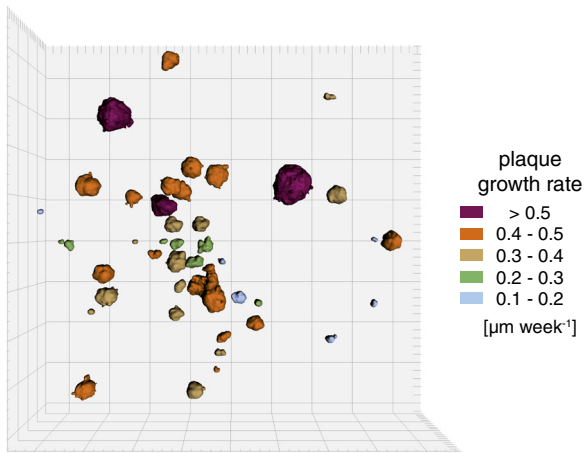**b**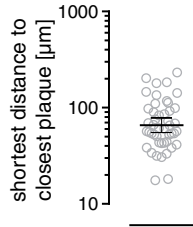**c**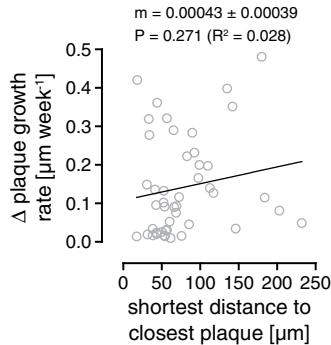

Supplement: MOESM8 [file 25658170]
